# Supplementary material for: Autocrine Activity of Extracellular Vesicles Induced by Icariin and Its Effectiveness in Glucocorticoid-Induced Injury of Bone Microvascular Endothelial Cells
Source: MDPI journal article supplement (doi:10.3390/cells11121921), 2022-06-14
Supplement: s1 [file s1]

**Supplementary Table S1.** Differentially expressed miRNA identified by high-throughput sequencing and associated literature review

| Index | Name of microRNA | Icariin vs Control<br>(up/down) | Fold change<br>(Icariin/Control) | Expression level |
|-------|------------------|---------------------------------|----------------------------------|------------------|
| 1     | hsa-miR-369-3p   | down                            | 0.27                             | middle           |
| 2     | hsa-miR-101-5p   | down                            | 0.32                             | middle           |
| 3     | hsa-miR-1469     | down                            | 0.36                             | middle           |
| 4     | hsa-miR-135b-3p  | down                            | 0.37                             | middle           |
| 5     | hsa-miR-505-5p   | down                            | 0.40                             | middle           |
| 6     | hsa-miR-34a-3p   | down                            | 0.43                             | middle           |
| 7     | hsa-miR-186-3p   | down                            | 0.47                             | middle           |
| 8     | hsa-miR-212-5p   | down                            | -infinite                        | low              |
| 9     | hsa-miR-219b-5p  | down                            | -infinite                        | low              |
| 10    | hsa-miR-494-3p   | down                            | -infinite                        | low              |
| 11    | hsa-mir-1303-p5  | down                            | -infinite                        | middle           |
| 12    | hsa-mir-6516-p3  | down                            | -infinite                        | low              |
| 13    | hsa-miR-10527-5p | down                            | -infinite                        | middle           |
| 14    | PC-3p-30597      | down                            | -infinite                        | low              |
| 15    | PC-5p-28622      | down                            | -infinite                        | low              |
| 16    | PC-3p-30534      | down                            | -infinite                        | low              |
| 17    | PC-5p-22551      | down                            | -infinite                        | middle           |
| 18    | PC-3p-33296      | down                            | -infinite                        | low              |
| 19    | PC-5p-28562      | down                            | -infinite                        | low              |
| 20    | PC-5p-27730      | down                            | -infinite                        | low              |
| 21    | hsa-miR-92b-5p   | up                              | infinite                         | low              |
| 22    | hsa-miR-101-2-5p | up                              | infinite                         | low              |
| 23    | hsa-miR-214-3p   | up                              | infinite                         | middle           |
| 24    | hsa-miR-219b-3p  | up                              | infinite                         | low              |
| 25    | hsa-miR-335-5p   | up                              | infinite                         | low              |
| 26    | hsa-miR-374c-5p  | up                              | infinite                         | middle           |
| 27    | hsa-miR-760      | up                              | infinite                         | low              |
| 28    | hsa-miR-1249-5p  | up                              | infinite                         | low              |
| 29    | hsa-miR-3168     | up                              | infinite                         | low              |
| 30    | hsa-miR-4508     | up                              | infinite                         | low              |

|    |                 |    |          |        |
|----|-----------------|----|----------|--------|
| 31 | PC-3p-43313     | up | infinite | low    |
| 32 | PC-5p-42924     | up | infinite | low    |
| 33 | PC-5p-40409     | up | infinite | low    |
| 34 | PC-3p-42144     | up | infinite | low    |
| 35 | PC-5p-36973     | up | infinite | low    |
| 36 | PC-3p-43372     | up | infinite | low    |
| 37 | PC-3p-37275     | up | infinite | low    |
| 38 | PC-5p-37872     | up | infinite | low    |
| 39 | hsa-miR-363-3p  | up | 10.81    | middle |
| 40 | hsa-miR-133a-3p | up | 8.39     | middle |
| 41 | hsa-miR-1-3p    | up | 8.02     | middle |
| 42 | hsa-miR-133a-5p | up | 6.62     | middle |
| 43 | hsa-miR-133b    | up | 5.95     | middle |
| 44 | hsa-miR-199a-3p | up | 3.40     | middle |
| 45 | hsa-miR-145-5p  | up | 3.02     | middle |
| 46 | hsa-miR-219a-5p | up | 2.93     | middle |
| 47 | hsa-miR-199a-5p | up | 2.56     | middle |
| 48 | hsa-miR-10b-5p  | up | 2.30     | middle |
| 49 | hsa-miR-338-5p  | up | 2.20     | middle |
| 50 | hsa-miR-190a-5p | up | 2        | middle |

**Supplementary Table S2.** Differentially expressed proteins between the Model group and the Control group.

| Protein ID | Fold change | Adj.p.val   | Regulation |
|------------|-------------|-------------|------------|
| S100AB     | 56.22641801 | 0.013139834 | up         |
| CD40       | 3.871571268 | 0.007662016 | up         |
| MME        | 2.72198199  | 0.00825969  | up         |
| ROBO3      | 2.670461172 | 0.000640298 | up         |
| SHH        | 2.32282831  | 0.005645997 | up         |
| IL32       | 2.273986519 | 0.01810351  | up         |
| VEGFA      | 2.062416237 | 0.004967094 | up         |
| NRCAM      | 1.555622839 | 0.016332655 | up         |
| FGF4       | 1.522294946 | 0.02028389  | up         |
| BMPR1A     | 1.369496546 | 0.027545274 | up         |
| GH1        | 1.300379745 | 0.03037901  | up         |
| LGMN       | 0.81409151  | 0.022241753 | down       |
| AFP        | 0.802656053 | 0.036886707 | down       |
| DKK3       | 0.715824206 | 0.0338396   | down       |
| IL36G      | 0.706879901 | 0.02028389  | down       |
| FSTL3      | 0.68470189  | 0.008618897 | down       |
| SCARB2     | 0.670054713 | 0.043089497 | down       |
| LGALS9     | 0.668097473 | 0.022241753 | down       |
| FSTL1      | 0.66750771  | 0.028256696 | down       |
| CXCL1      | 0.667026409 | 0.0338396   | down       |
| FLT1       | 0.666415012 | 0.022241753 | down       |
| CDH3       | 0.655557701 | 0.043089497 | down       |
| CLU        | 0.644129443 | 0.045346808 | down       |
| IL6R       | 0.635128283 | 0.014263345 | down       |
| TNFRSF11B  | 0.634876117 | 0.010530573 | down       |
| TNFRSF11A  | 0.626375674 | 0.025195159 | down       |
| CRTAM      | 0.623938841 | 0.0338396   | down       |
| TNFRSF1A   | 0.606342841 | 0.036886707 | down       |
| PLAUR      | 0.603419501 | 0.009866887 | down       |
| LDLR       | 0.583130282 | 0.008618897 | down       |
| LTA        | 0.580573864 | 0.036886707 | down       |
| TIMP4      | 0.565981807 | 0.049107913 | down       |
| FAS        | 0.56021499  | 0.010080287 | down       |
| CXCL16     | 0.560155743 | 0.029013949 | down       |
| IGFBP1     | 0.554532181 | 0.0338396   | down       |
| BSG        | 0.551867994 | 0.008834354 | down       |
| PI3        | 0.548277818 | 0.030895065 | down       |
| DSG2       | 0.512840553 | 0.019254657 | down       |
| AXL        | 0.510493425 | 0.009579491 | down       |
| CDH13      | 0.473281965 | 0.006680472 | down       |
| CCL26      | 0.46809368  | 0.039275963 | down       |
| TNFRSF1B   | 0.462345269 | 0.03749305  | down       |
| TNFRSF10C  | 0.460391199 | 0.005349222 | down       |

|        |             |             |      |
|--------|-------------|-------------|------|
| REN    | 0.440865129 | 0.010530573 | down |
| LGALS3 | 0.434429603 | 0.000197865 | down |
| ICAM1  | 0.417325988 | 0.047383236 | down |
| RBP4   | 0.41431661  | 0.022241753 | down |
| MMP10  | 0.41247727  | 0.000474226 | down |
| CCL23  | 0.411568467 | 0.00020881  | down |
| ENO2   | 0.401547029 | 0.001485212 | down |
| BDNF   | 0.390946018 | 0.0338396   | down |
| IGFBP4 | 0.382464021 | 0.046300423 | down |
| LIF    | 0.37277882  | 0.001485212 | down |
| IL6R   | 0.370503352 | 0.047581298 | down |
| RGMB   | 0.333312098 | 3.78E-05    | down |
| DLL1   | 0.299374369 | 0.0338396   | down |
| TFPI   | 0.292241474 | 0.000424348 | down |
| IL11   | 0.250549019 | 0.000409466 | down |
| CCL14  | 0.221447435 | 3.78E-05    | down |
| LYVE1  | 0.186006543 | 0.001200941 | down |
| CCL15  | 0.12458644  | 0.000414012 | down |
| CCL8   | 0.100239176 | 0.013439777 | down |

---

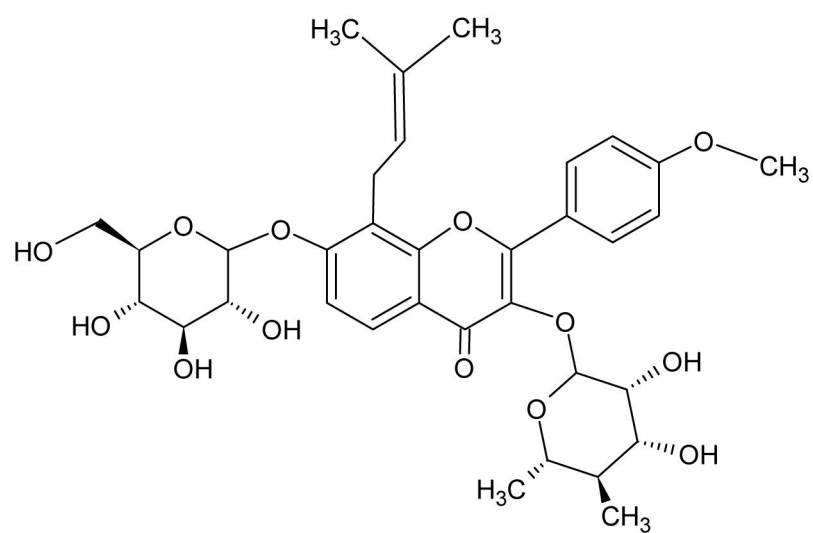

**Supplementary Figure S1. Molecular formula of icariin.**
